# Supplementary material for: The Cording Phenotype of Mycobacterium tuberculosis Induces the Formation of Extracellular Traps in Human Macrophages
Source: PubMed Central journal article supplement (PMC5483443; doi:10.3389/fcimb.2017.00278), 2017-06-26
Supplement: Image1.pdf [file Image1.pdf]

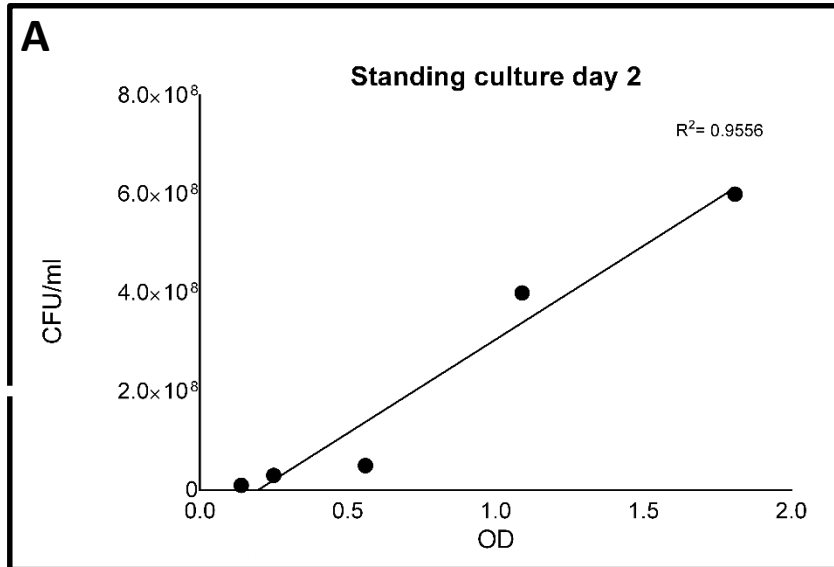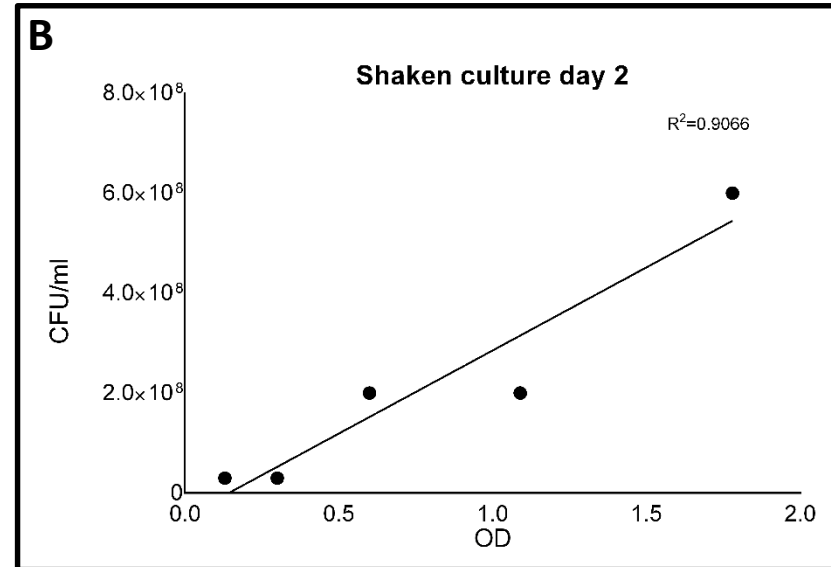

**Supplemental Figure S1.** Bacterial growth of **(A)** standing culture and **(B)** shaken culture of H37Rv on day 2 after reseeded. Graphs depict optical density (OD) versus CFU/ml.

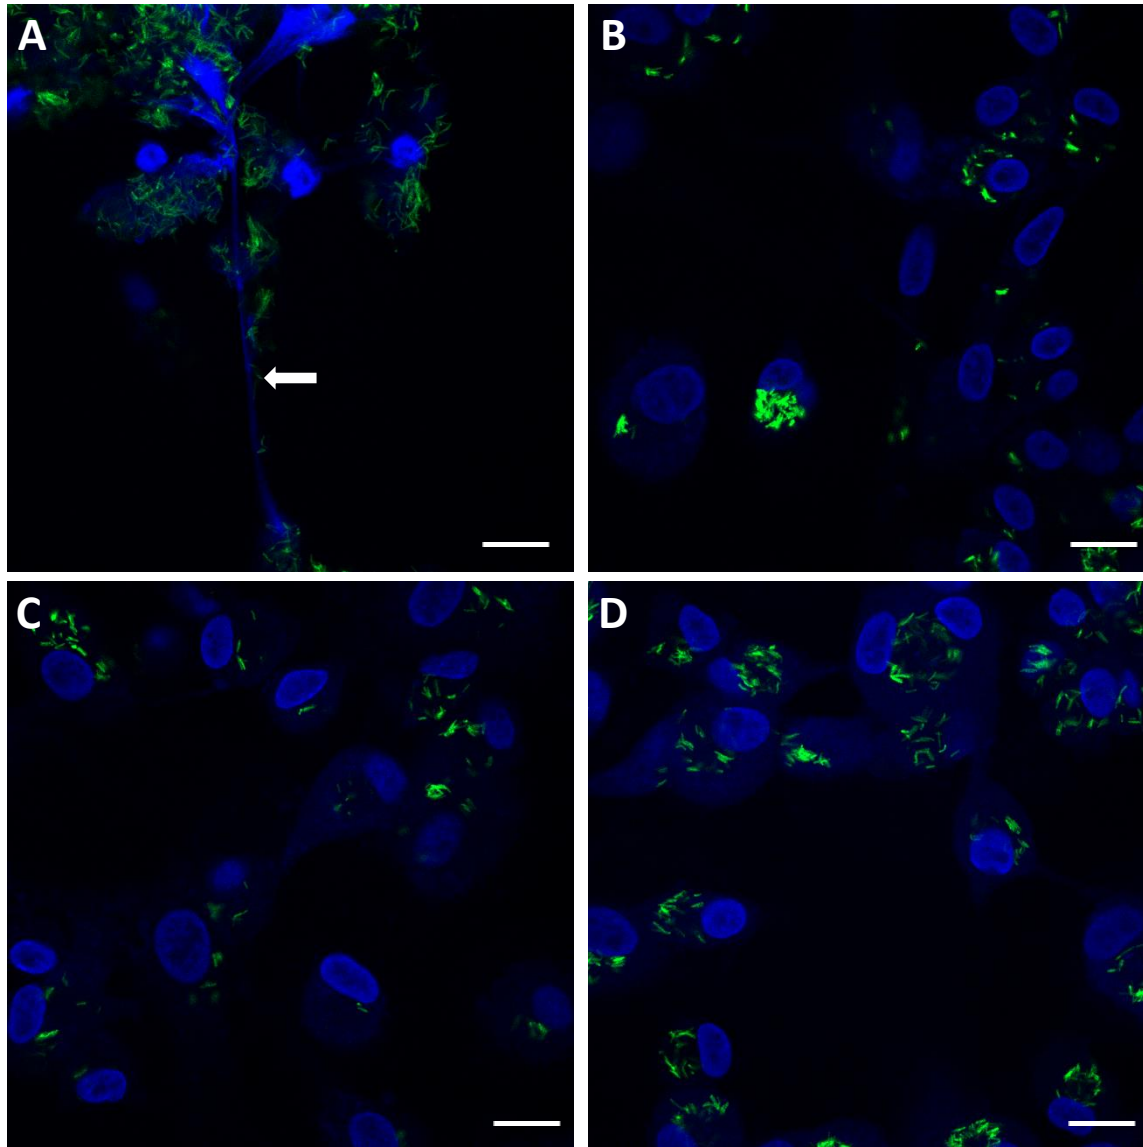

**Supplemental Figure S2.** Human macrophages were infected with H37Rv-GFP bacteria harvested from **(A)** shaken culture at MOI5 or with bacteria harvested from **(B)** standing culture at MOI10, **(C)** MOI20 and **(D)** MOI40. The cells were fixed after 24 h and stained with DAPI. Bar: 20 $\mu$ m.

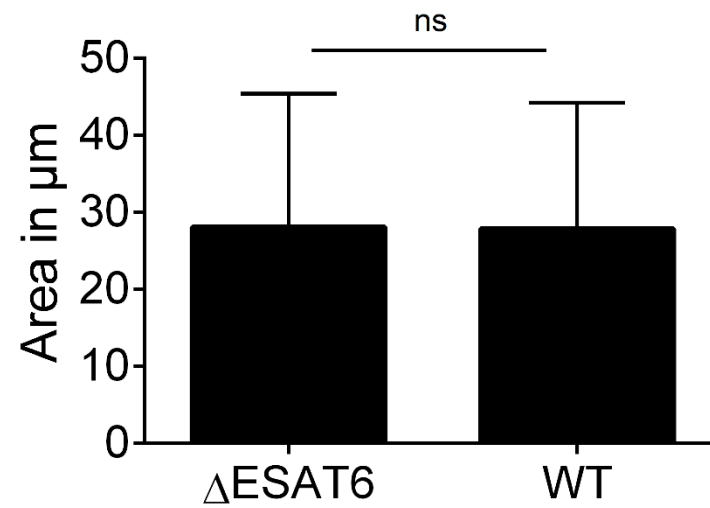

**Supplemental Figure S3.** Images of aggregates/cords from H37Rv- $\Delta$ ESAT6 and wild-type (WT) from shaken cultures were analyzed using ImageJ, and the area of the aggregates/cords was calculated.
